# Supplementary material for: Functional Evaluation of KEL as an Oncogenic Gene in the Progression of Acute Erythroleukemia
Source: Hindawi journal article supplement (doi:10.1155/2022/5885342), 2022-01-01

K562 (NaBu)

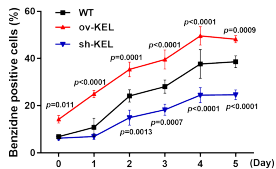

# B

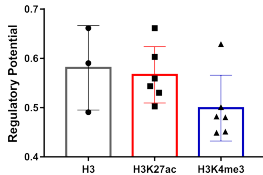

**C**

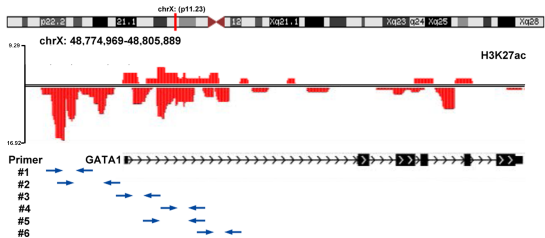

Supplement: f3 [file 5885342.f3.pdf]
