# Supplementary material for: Functional Evaluation of KEL as an Oncogenic Gene in the Progression of Acute Erythroleukemia
Source: Oxid Med Cell Longev. 2022 Jan 30;2022:5885342. doi: 10.1155/2022/5885342 (PMC8819426; doi:10.1155/2022/5885342)
Supplement: Supplementary 7 — Additional file: Table S4: the results of phosphorylated protein array. [file 5885342.f7.txt]

Table S4. The results of phosphorylated protein array.
Name	Gene Symbol	Uniprot	K562_Phos/ Unphos	K562 (ov-KEL)_Phos/ Unphos	FC��K562 (ov-KEL)_vs_K562
BTK (Phospho-Tyr223)	BTK	Q06187	0.51	2.30	4.50
Cyclin B1 (Phospho-Ser126)	CCNB1	P14635	0.43	1.86	4.29
Smad2 (Phospho-Thr220)	SMAD2	Q15796	0.91	3.26	3.59
4E-BP1 (Phospho-Ser65)	EIF4EBP1	Q13541	0.06	0.20	3.40
ACC1 (Phospho-Ser79)	ACACA	Q13085	0.28	0.85	2.98
14-3-3 beta/zeta (Phospho-Ser184/186)	YWHAB/YWHAZ	P31946/P63104	0.34	1.02	2.96
PLC beta3 (Phospho-Ser1105)	PLCB3	Q01970	0.59	1.75	2.95
MEF2C (Phospho-Ser396)	MEF2C	Q06413	0.74	2.03	2.74
p53 (Phospho-Ser9)	TP53	P04637	0.53	1.38	2.61
Caspase 9 (Phospho-Thr125)	CASP9	P55211	0.32	0.81	2.58
p130Cas (Phospho-Tyr410)	BCAR1	P56945	0.51	1.30	2.55
FLT3 (Phospho-Tyr599)	FLT3	P36888	0.47	1.20	2.52
CaMK4 (Phospho-Thr196/200)	CAMK4	Q16566	0.89	2.17	2.43
ETK (Phospho-Tyr40)	BMX	P51813	0.87	2.05	2.36
IRS-1 (Phospho-Ser312)	IRS1	P35568	0.46	1.08	2.36
GSK3 beta (Phospho-Ser9)	GSK3B	P49841	1.08	2.40	2.21
P90RSK (Phospho-Thr573)	RPS6KA1	Q15418	0.32	0.71	2.21
IL-2RA/CD25 (Phospho-Ser268)	IL2RA	P01589	1.47	3.22	2.20
CDC25A (Phospho-Ser75)	CDC25A	P30304	0.41	0.89	2.17
HSL (Phospho-Ser554)	LIPE	Q05469	0.21	0.45	2.15
CREB (Phospho-Ser133)	CREB1	P16220	0.84	1.81	2.14
HSP90 co-chaperone Cdc37 (Phospho-Ser13)	CDC37	Q16543	0.69	1.42	2.07
PKC theta (Phospho-Ser676)	PRKCQ	Q04759	1.32	2.63	2.00
WAVE1 (Phospho-Tyr125)	WASF1	Q92558	1.11	2.15	1.93
MARCKS (Phospho-Ser163)	MARCKS	P29966	1.78	3.36	1.89
ATP1A1/Na+K+ ATPase1 (Phospho-Ser23)	ATP1A1	P06685	0.64	1.20	1.88
DARPP-32 (Phospho-Thr75)	PPP1R1B	Q9UD71	0.75	1.38	1.85
LYN (Phospho-Tyr507)	LYN	P07948	0.07	0.12	1.84
Survivin (Phospho-Thr117)	BIRC5	O15392	1.03	1.88	1.83
Met (Phospho-Tyr1234)	MET	P08581	1.45	2.64	1.82
S6 Ribosomal Protein (Phospho-Ser235)	RPS6	P62753	0.87	1.58	1.81
HDAC5 (Phospho-Ser259)	HDAC5	Q9UQL6	0.61	1.10	1.79
Src (Phospho-Ser75)	SRC	P12931	1.34	2.39	1.78
SHP-2 (Phospho-Tyr542)	PTPN11	Q06124	0.89	1.58	1.78
AMPK beta1 (Phospho-Ser182)	PRKAA1	Q13131	0.33	0.59	1.78
Synuclein alpha (Phospho-Tyr125)	SNCA	P37840	0.76	1.34	1.77
PKC alpha (Phospho-Tyr657)	PRKCA	P17252	1.52	2.67	1.76
Integrin beta-1 (Phospho-Thr788)	ITGB1	P05556	0.49	0.85	1.75
EGFR (Phospho-Tyr1172)	EGFR	P00533	0.16	0.28	1.72
LAT (Phospho-Tyr191)	LAT	O43561	1.59	2.74	1.72
c-Jun (Phospho-Ser243)	JUN	P05412	1.17	2.01	1.71
Paxillin (Phospho-Tyr31)	PXN	P49023	0.50	0.85	1.69
PKD1/PKC mu (Phospho-Ser205)	PRKD1	Q15139	1.63	2.74	1.68
IkB-beta (Phospho-Thr19)	NFKBIB	Q15653	1.56	2.62	1.67
CDK7 (Phospho-Thr170)	CDK7	P50613	1.36	2.26	1.67
Synapsin (Phospho-Ser62)	SYN1	P17600	0.66	1.10	1.66
Src (Phospho-Tyr418)	SRC	P12931	0.10	0.16	1.66
SHP-2 (Phospho-Tyr580)	PTPN11	Q06124	0.80	1.29	1.62
DAPP1 (Phospho-Tyr139)	DAPP1	Q9UHF2	1.32	2.13	1.61
MKP-1 (Phospho-Ser359)	DUSP1	P28562	0.83	1.32	1.60
Abl1 (Phospho-Tyr204)	ABL1	P00519	0.03	0.05	1.59
Amyloid beta A4 (Phospho-Thr743/668)	APP	P05067	0.61	0.97	1.59
Arrestin-1 (Phospho-Ser412)	ARRB1	P49407	0.63	0.99	1.57
c-Jun (Phospho-Tyr170)	JUN	P05412	0.55	0.86	1.57
NFkB-p100/p52 (Phospho-Ser869)	NFKB2	Q00653	0.42	0.67	1.57
ALK (Phospho-Tyr1604)	ALK	Q9UM73	1.44	2.24	1.56
EGFR (Phospho-Tyr1092)	EGFR	P00533	0.93	1.44	1.55
AKT1 (Phospho-Tyr326)	AKT1	P31749	1.25	1.93	1.55
Estrogen Receptor-alpha (Phospho-Ser118)	ESR1	P03372	1.34	2.06	1.54
FKHRL1/FOXO3A (Phospho-Ser253)	FOXO3	O43524	0.69	1.06	1.54
AKT1 (Phospho-Thr308)	AKT1	P31749	0.69	1.06	1.53
IKK-beta (Phospho-Tyr199)	IKBKB	O14920	0.42	0.64	1.53
Ret (Phospho-Tyr905)	RET	P07949	1.46	2.23	1.52
Elk1 (Phospho-Ser389)	ELK1	P19419	0.54	0.82	1.52
MEF2A (Phospho-Ser408)	MEF2A	Q02078	0.30	0.46	1.52
MARCKS (Phospho-Ser158)	MARCKS	P29966	0.90	1.36	1.51
HER2 (Phospho-Tyr1248)	ERBB2	P04626	0.70	1.06	1.50
p27Kip1 (Phospho-Ser10)	CDKN1B	P46527	2.12	3.18	1.50
JunB (Phospho-Ser79)	JUNB	P17275	0.57	0.85	1.50
SAPK/JNK (Phospho-Tyr185)	MAPK9/MAPK8/MAPK10	P45983/P45984/P53779	1.06	1.57	1.49
GluR1 (Phospho-Ser849)	GRIA1	P42261	0.18	0.27	1.48
c-Jun (Phospho-Ser63)	JUN	P05412	0.38	0.56	1.48
MAPKAPK2 (Phospho-Ser272)	MAPKAPK2	P49137	0.70	1.03	1.47
Tyrosine Hydroxylase (Phospho-Ser40)	TH	P07101	0.67	0.99	1.47
MKK7/MAP2K7 (Phospho-Ser271)	MAP2K7	O14733	1.27	1.85	1.45
Epo-R (Phospho-Tyr368)	EPOR	P19235	1.34	1.94	1.45
P70S6K (Phospho-Ser371)	RPS6KB1	P23443	0.68	0.98	1.45
B-RAF (Phospho-Thr598)	BRAF	P15056	0.08	0.11	1.44
IKK-beta (Phospho-Tyr188)	IKBKB	O14920	0.83	1.20	1.44
Catenin beta (Phospho-Tyr489)	CTNNB1	P35222	1.28	1.83	1.43
EGFR (Phospho-Thr693)	EGFR	P00533	0.50	0.70	1.40
AKT1 (Phospho-Tyr474)	AKT1	P31749	1.11	1.54	1.39
c-Jun (Phospho-Thr91)	JUN	P05412	0.97	1.34	1.38
IR (Phospho-Tyr1361)	INSR	P06213	3.45	4.73	1.37
CREB (Phospho-Ser121)	CREB1	P16220	1.47	2.02	1.37
A-RAF (Phospho-Tyr301/302)	ARAF	P10398	1.47	2.01	1.37
Gab2 (Phospho-Ser159)	GAB2	Q9UQC2	0.86	1.16	1.35
p53 (Phospho-Ser46)	TP53	P04637	1.34	1.81	1.35
MEK1 (Phospho-Ser298)	MAP2K1	Q02750	0.32	0.43	1.34
CDC25B (Phospho-Ser353)	CDC25B	P30305	4.26	5.68	1.33
p53 (Phospho-Ser378)	TP53	P04637	3.76	4.98	1.32
DNA-PK (Phospho-Thr2638)	PRKDC	P78527	0.66	0.86	1.32
FAS (Phospho-Tyr291)	FAS	P25445	0.58	0.77	1.31
MSK1 (Phospho-Ser360)	RPS6KA5	O75582	0.19	0.25	1.31
HDAC8 (Phospho-Ser39)	HDAC8	Q9BY41	1.06	1.39	1.31
HER2 (Phospho-Thr686)	ERBB2	P04626	1.02	1.31	1.29
PKC epsilon (Phospho-Ser729)	PRKCE	Q02156	2.93	3.74	1.28
MKK4/SEK1 (Phospho-Thr261)	MAP2K4	P45985	0.12	0.16	1.27
p38 MAPK (Phospho-Thr180)	MAPK14	Q16539	1.64	2.08	1.27
STAT6 (Phospho-Tyr641)	STAT6	P42226	1.46	1.85	1.27
AurA (Phospho-Thr288)	AURKA	O14965	3.22	4.08	1.26
ATF4 (Phospho-Ser245)	ATF4	P18848	2.42	3.03	1.25
PECAM-1 (Phospho-Tyr713)	PECAM1	P16284	0.17	0.21	1.25
Tau (Phospho-Ser356)	MAPT	P10636	0.06	0.07	1.25
CD227/mucin 1 (Phospho-Tyr1243)	MUC1	P15941	2.35	2.91	1.24
B-RAF (Phospho-Ser601)	BRAF	P15056	1.19	1.47	1.24
LCK (Phospho-Ser59)	LCK	P06239	1.72	2.12	1.23
CDC25B (Phospho-Ser323)	CDC25B	P30305	1.15	1.41	1.23
PLC beta3 (Phospho-Ser537)	PLCB3	Q01970	1.14	1.39	1.23
Myc (Phospho-Thr358)	MYC	P01106	0.13	0.16	1.23
4E-BP1 (Phospho-Thr45)	EIF4EBP1	Q13541	0.82	1.00	1.22
M-CSF Receptor (Phospho-Tyr561)	CSF1R	P07333	2.97	3.61	1.22
IRS-1 (Phospho-Ser323)	IRS1	P35568	0.44	0.53	1.22
VEGFR2 (Phospho-Tyr1054)	KDR	P35968	1.26	1.53	1.21
EGFR (Phospho-Tyr1016)	EGFR	P00533	1.23	1.49	1.21
NFkB-p65 (Phospho-Ser468)	RELA	Q04206	1.38	1.66	1.21
Caspase 9 (Phospho-Ser144)	CASP9	P55211	1.55	1.29	0.83
PAK1/2/3 (Phospho-Thr423/402/421)	PAK1/2/3	Q13153/Q13177/O75914	0.09	0.08	0.83
Tau (Phospho-Ser404)	MAPT	P10636	0.57	0.47	0.83
AKT1 (Phospho-Ser124)	AKT1	P31749	0.71	0.59	0.83
MEF2A (Phospho-Thr319)	MEF2A	Q02078	0.89	0.74	0.83
EPHB1/2 (Phospho-Tyr594/604)	EPHB1/2	P54762/P29317/P29323	1.66	1.37	0.83
PDK1 (Phospho-Ser241)	PDPK1	O15530	0.64	0.52	0.82
HDAC3 (Phospho-Ser424)	HDAC3	O15379	0.30	0.25	0.82
Tyrosine Hydroxylase (Phospho-Ser31)	TH	P07101	0.70	0.57	0.82
EGFR (Phospho-Tyr1110)	EGFR	P00533	1.93	1.58	0.82
IRS-1 (Phospho-Ser794)	IRS1	P35568	3.88	3.17	0.82
PTEN (Phospho-Ser380/Thr382/Thr383)	PTEN	P60484	0.69	0.56	0.82
MKK3/MAP2K3 (Phospho-Thr222)	MAP2K3	P46734	1.24	1.01	0.82
Caspase 2 (Phospho-Ser157)	CASP2	P42575	2.04	1.66	0.82
MEK1 (Phospho-Thr286)	MAP2K1	Q02750	1.09	0.89	0.81
HSP27 (Phospho-Ser82)	HSPB1	P04792	0.92	0.74	0.81
ATF2 (Phospho-Thr69/51)	ATF2	P15336	2.46	2.00	0.81
eNOS (Phospho-Ser615)	NOS3	P29474	1.70	1.37	0.81
RelB (Phospho-Ser552)	RELB	Q01201	1.95	1.57	0.81
p53 (Phospho-Ser37)	TP53	P04637	1.43	1.16	0.81
Cyclin E2 (Phospho-Thr392)	CCNE2	O96020	2.09	1.69	0.81
Catenin beta (Phospho-Ser33)	CTNNB1	P35222	2.86	2.30	0.80
HSF1 (Phospho-Ser303)	HSF1	Q00613	1.07	0.86	0.80
PKC beta/PKCB (Phospho-Ser661)	PRKCB	P05771	0.97	0.78	0.80
MEK2 (Phospho-Thr394)	MAP2K2	P36507	1.94	1.55	0.80
ADD1 (Phospho-Ser726)	ADD1	P35611	1.82	1.45	0.80
HDAC1 (Phospho-Ser421)	HDAC1	Q13547	0.07	0.06	0.79
Raf1 (Phospho-Ser289)	RAF1	P04049	0.49	0.39	0.79
MKK4/SEK1 (Phospho-Ser80)	MAP2K4	P45985	0.68	0.54	0.79
Zap-70 (Phospho-Tyr493)	ZAP70	P43403	0.46	0.36	0.79
Zap-70 (Phospho-Tyr292)	ZAP70	P43403	0.62	0.49	0.79
p44/42 MAPK (Phospho-Tyr204)	MAPK3	P27361	2.91	2.28	0.79
CaMK1-alpha (Phospho-Thr177)	CAMK1	Q14012	1.47	1.14	0.78
p53 (Phospho-Ser20)	TP53	P04637	0.63	0.49	0.78
STAT3 (Phospho-Tyr705)	STAT3	P40763	1.43	1.11	0.77
WEE1 (Phospho-Ser53)	WEE1	P30291	0.78	0.60	0.77
ATRIP (Phospho-Ser68/72)	ATRIP	Q8WXE1	0.17	0.13	0.77
BAD (Phospho-Ser155)	BAD	Q92934	1.10	0.85	0.77
MSK1 (Phospho-Ser376)	RPS6KA5	O75582	1.66	1.27	0.77
P95/NBS1 (Phospho-Ser343)	NBN	O60934	0.45	0.34	0.77
PPAR-BP (Phospho-Thr1457)	MED1	Q15648	0.75	0.58	0.76
IkB-alpha (Phospho-Ser32/36)	NFKBIA	P25963	12.80	9.76	0.76
Raf1 (Phospho-Tyr341)	RAF1	P04049	1.07	0.82	0.76
Ezrin (Phospho-Tyr353)	EZR	P15311	2.52	1.91	0.76
AMPK1/AMPK2 (Phospho-Ser485/491)	PRKAA1/PRKAA2	Q13131/P54646	1.29	0.97	0.75
Histone H2A.X (Phospho-Ser139)	H2AFX	P16104	1.69	1.27	0.75
PKC zeta (Phospho-Thr410)	PRKCZ	Q05513	1.15	0.86	0.75
ATF1 (Phospho-Ser63)	ATF1	P18846	0.50	0.38	0.75
IGF1R (Phospho-Tyr1161)	IGF1R	P08069	3.66	2.74	0.75
IL-13R/CD213a1 (Phospho-Tyr405)	IL13RA1	P78552	7.57	5.67	0.75
EGFR (Phospho-Tyr1069)	EGFR	P00533	3.68	2.76	0.75
BCL-2 (Phospho-Thr69)	BCL2	P10415	2.26	1.68	0.74
EGFR (Phospho-Thr678)	EGFR	P00533	2.95	2.19	0.74
Chk1 (Phospho-Ser317)	CHEK1	O14757	0.59	0.44	0.74
Keratin 8 (Phospho-Ser431)	KRT8	P05787	2.59	1.92	0.74
KIT (Phospho-Tyr721)	KIT	P10721	2.01	1.48	0.74
p130Cas (Phospho-Tyr165)	BCAR1	P56945	2.26	1.67	0.74
14-3-3 theta/tau (Phospho-Ser232)	YWHAQ	P27348	1.81	1.32	0.73
GSK3 alpha (Phospho-Ser21)	GSK3A	P49840	1.50	1.09	0.73
TYK2 (Phospho-Tyr1054)	TYK2	P29597	1.80	1.31	0.73
Calmodulin (Phospho-Thr79/Ser81)	CALM1	P62158	0.39	0.28	0.73
Raf1 (Phospho-Ser259)	RAF1	P04049	1.52	1.10	0.72
HER4/ErbB4 (Phospho-Tyr1284)	ERBB4	Q15303	1.62	1.16	0.72
p38 MAPK (Phospho-Tyr182)	MAPK14	Q16539	0.13	0.10	0.72
SP1 (Phospho-Thr739)	SP1	P08047	1.19	0.85	0.72
VEGFR2 (Phospho-Tyr951)	KDR	P35968	0.11	0.08	0.71
Tau (Phospho-Thr205)	MAPT	P10636	1.31	0.93	0.71
BLNK (Phospho-Tyr96)	BLNK	Q8WV28	0.81	0.58	0.71
p53 (Phospho-Ser392)	TP53	P04637	1.36	0.96	0.71
mTOR (Phospho-Ser2448)	MTOR	P42345	3.15	2.22	0.71
Chk1 (Phospho-Ser345)	CHEK1	O14757	1.56	1.10	0.70
FKHR (Phospho-Ser256)	FOXO1	Q12778	0.81	0.57	0.70
PDGFR beta (Phospho-Tyr1021)	PDGFRB	P09619	3.45	2.42	0.70
Smad2 (Phospho-Ser250)	SMAD2	Q15796	1.36	0.96	0.70
VEGFR2 (Phospho-Tyr1059)	KDR	P35968	3.32	2.32	0.70
NFkB-p65 (Phospho-Ser276)	RELA	Q04206	2.19	1.52	0.70
DAB1 (Phospho-Tyr220)	DAB1	O75553	2.30	1.59	0.69
CD19 (Phospho-Tyr531)	CD19	P15391	2.57	1.76	0.69
p53 (Phospho-Ser315)	TP53	P04637	0.47	0.32	0.69
NFkB-p105/p50 (Phospho-Ser337)	NFKB1	P19838	6.54	4.48	0.68
P90RSK (Phospho-Ser380)	RPS6KA1	Q15418	1.88	1.28	0.68
EPHA2/3/4 (Phospho-Tyr588/596)	EPHA2/3/4	P29317/P29320/P54764	0.99	0.67	0.68
SMC1 (Phospho-Ser957)	SMC1A	Q14683	2.67	1.80	0.67
BCR (Phospho-Tyr177)	BCR	P11274	1.14	0.77	0.67
BIM (Phospho-Ser69/65)	BCL2L11	O43521	3.08	2.06	0.67
FAK (Phospho-Tyr397)	PTK2	Q05397	0.43	0.29	0.67
KIT (Phospho-Tyr936)	KIT	P10721	1.47	0.97	0.67
Cyclin D3 (Phospho-Thr283)	CCND3	P30281	0.79	0.53	0.66
Opioid Receptor (Phospho-Ser375)	OPRM1	P35372	3.40	2.23	0.66
Pyk2 (Phospho-Tyr402)	PTK2B	Q14289	3.15	2.06	0.65
CD4 (Phospho-Ser433)	CD4	P01730	0.46	0.30	0.65
GABA-RB (Phospho-Ser434)	GABRB1	P18505	2.81	1.82	0.65
EGFR (Phospho-Tyr1197)	EGFR	P00533	1.34	0.87	0.65
p27Kip1 (Phospho-Thr187)	CDKN1B	P46527	3.56	2.31	0.65
CK2-b (Phospho-Ser209)	CSNK2B	P67870	1.34	0.86	0.64
Integrin beta-4 (Phospho-Tyr1510)	ITGB4	P16444	0.92	0.59	0.64
IL-4R/CD124 (Phospho-Tyr497)	IL4R	P24394	0.83	0.53	0.64
Smad3 (Phospho-Ser204)	SMAD3	P84022	0.52	0.33	0.63
Ras-GRF1 (Phospho-Ser916)	RASGRF1	Q13972	0.32	0.20	0.63
Tau (Phospho-Ser262)	MAPT	P10636	2.25	1.42	0.63
JNK1/2/3 (Phospho-Thr183/Tyr185)	MAPK8/MAPK9/MAPK10	P45983/P45984/P53779	1.14	0.72	0.63
Raf1 (Phospho-Ser621)	RAF1	P04049	1.24	0.77	0.63
EPB41 (Phospho-Tyr418/660)	EPB41	P11171	1.33	0.83	0.62
NFkB-p105/p50 (Phospho-Ser927)	NFKB1	P19838	0.29	0.18	0.62
JunB (Phospho-Ser259)	JUNB	P17275	1.99	1.22	0.62
FGFR1 (Phospho-Tyr154)	FGFR1	P11362	1.89	1.15	0.61
Chk1 (Phospho-Ser280)	CHEK1	O14757	3.41	2.05	0.60
TIF-IA (Phospho-Ser649)	RRN3	Q9NYV6	1.40	0.84	0.60
PEA-15 (Phospho-Ser116)	PEA15	Q15121	2.36	1.42	0.60
PLD1 (Phospho-Ser561)	PLD1	Q13393	2.44	1.45	0.60
Dok-2 (Phospho-Tyr299)	DOK2	O60496	1.18	0.70	0.59
Pim-1 (Phospho-Tyr309)	PIM1	P06803	0.61	0.36	0.59
FAK (Phospho-Tyr861)	PTK2	Q05397	1.88	1.09	0.58
Connexin 43 (Phospho-Ser367)	GJA1	P17302	2.38	1.36	0.57
PAK3 (Phospho-Ser154)	PAK3	O75914	3.97	2.27	0.57
Elk1 (Phospho-Ser383)	ELK1	P19419	5.88	3.30	0.56
HSP27 (Phospho-Ser78)	HSPB1	P04792	2.89	1.61	0.56
Pyk2 (Phospho-Tyr580)	PTK2B	Q14289	1.28	0.71	0.56
Chk1 (Phospho-Ser286)	CHEK1	O14757	0.84	0.46	0.55
BAD (Phospho-Ser91/128)	BAD	Q92934	1.04	0.57	0.55
HRS (Phospho-Tyr334)	HGS	O14964	0.93	0.51	0.55
Rb (Phospho-Ser807)	RB1	P06400	0.66	0.36	0.54
FAK (Phospho-Tyr407)	PTK2	Q05397	3.13	1.69	0.54
HSL (Phospho-Ser552/563)	LIPE	Q05469	0.88	0.47	0.53
P70S6K (Phospho-Thr229)	RPS6KB1	P23443	0.81	0.41	0.51
14-3-3 zeta (Phospho-Ser58)	YWHAZ	P63104	1.37	0.69	0.50
HER2 (Phospho-Tyr1221/Tyr1222)	ERBB2	P04626	0.67	0.34	0.50
BCL-2 (Phospho-Thr56)	BCL2	P10415	4.07	2.03	0.50
Caspase 9 (Phospho-Tyr153)	CASP9	P55211	0.93	0.46	0.49
IKK-gamma (Phospho-Ser31)	IKBKG	Q9Y6K9	0.48	0.24	0.49
Tau (Phospho-Thr212)	MAPT	P10636	0.57	0.28	0.48
MKK6/MAP2K6 (Phospho-Ser207)	MAP2K6	P52564	1.23	0.59	0.48
PLCG1 (Phospho-Tyr771)	PLCG1	P19174	1.29	0.60	0.46
KSR (Phospho-Ser392)	KSR1	Q8IVT5	2.13	0.97	0.45
Vinculin (Phospho-Tyr821)	VCL	P18206	5.41	2.33	0.43
MSK1 (Phospho-Thr581)	RPS6KA5	O75582	1.28	0.47	0.36
p38 MAPK (Phospho-Tyr322)	MAPK14	Q16539	1.77	0.62	0.35
STAT5B (Phospho-Ser731)	STAT5B	P51692	2.94	0.95	0.32
Chk2 (Phospho-Thr383)	CHEK2	O96017	1.10	0.33	0.30
IKK-alpha/beta (Phospho-Ser180/181)	CHUK/IKBKB	O15111/O14920	1.32	0.39	0.30
Caspase 6 (Phospho-Ser257)	CASP6	P55212	1.15	0.32	0.28
PAK1/2 (Phospho-Ser199)	PAK1/2	Q13153/Q13177	2.91	0.82	0.28
PKC pan activation site (Phospho)	PRKCA/PRKCB/PRKCD/PRKCE/PRKCG/PRKCH/PRKCQ/PRKCZ	P17252/P05771/Q05655/Q02156/P05129/P24723/Q04759/Q05513	1.58	0.44	0.28
Smad1 (Phospho-Ser187)	SMAD1	Q15797	4.70	1.31	0.28
mTOR (Phospho-Thr2446)	MTOR	P42345	4.89	1.27	0.26
Integrin beta-3 (Phospho-Tyr785)	ITGB3	P05106	4.21	0.90	0.21
VEGFR2 (Phospho-Tyr1175)	KDR	P35968	2.37	0.49	0.21
ACC1 (Phospho-Ser80)	ACACA	Q13085	0.14	0.45	3.24
eIF4G (Phospho-Ser1108)	EIF4G1	Q04637	0.49	0.90	1.85
Abl1 (Phospho-Thr754/735)	ABL1	P00519	0.88	1.39	1.58
CREB (Phospho-Ser129)	CREB1	P16220	1.28	1.85	1.44
Estrogen Receptor-alpha (Phospho-Ser104)	ESR1	P03372	0.70	0.97	1.38
NFkB-p105/p50 (Phospho-Ser893)	NFKB1	P19838	0.67	0.90	1.34
p53 (Phospho-Ser6)	TP53	P04637	1.35	1.79	1.32
ATP-Citrate Lyase (Phospho-Ser454)	ACLY	P53396	0.90	1.19	1.32
Stathmin 1 (Phospho-Ser37)	STMN1	P16949	0.96	1.27	1.32
MAP3K8/COT (Phospho-Thr290)	MAP3K8	P41279	0.50	0.64	1.27
PLCG2 (Phospho-Tyr753)	PLCG2	P16885	0.53	0.65	1.22
GRK2 (Phospho-Ser29)	GRK2	P25098	0.93	0.76	0.82
PP2A-alpha (Phospho-Tyr307)	PPP2CA	P67775	0.30	0.24	0.81
ATF2 (Phospho-Ser112/94)	ATF2	P15336	1.72	1.39	0.81
GTPase activating protein (Phospho-Ser387)	RACGAP1	Q9H0H5	3.04	2.44	0.80
Merlin (Phospho-Ser10)	NF2	P35240	1.18	0.94	0.80
PKC alpha/beta II (Phospho-Thr638)	PRKCA	P17252	2.56	2.02	0.79
DDX5/DEAD-box protein 5 (Phospho-Tyr593)	DDX5	P17844	3.27	2.57	0.79
Kv1.3/KCNA3 (Phospho-Tyr135)	KCNA3	P22001	2.95	2.31	0.78
FOXO1/3/4-pan (Phospho-Thr24/32)	FOXO1/3/4	Q12778/O43524/P98177	1.15	0.89	0.77
P70S6K (Phospho-Ser424)	RPS6KB1	P23443	3.54	2.69	0.76
Keratin 18 (Phospho-Ser33)	KRT18	P05783	2.51	1.89	0.75
Caspase 8 (Phospho-Ser347)	CASP8	Q14790	1.57	1.17	0.74
MKK3/MAP2K3 (Phospho-Ser189)	MAP2K3	P46734	0.40	0.30	0.74
EEF2 (Phospho-Thr56)	EEF2	P13639	0.58	0.43	0.74
NFkB-p105/p50 (Phospho-Ser907)	NFKB1	P19838	1.07	0.78	0.73
RSK1/2/3/4 (Phospho-Ser221/227/218/232)	RPS6KA1/RPS6KA3/RPS6KA2	Q15418/P51812/Q15349/Q9UK32	0.60	0.44	0.73
Rb (Phospho-Ser795)	RB1	P06400	1.89	1.38	0.73
Androgen Receptor (Phospho-Ser213)	AR	P10275	1.73	1.21	0.70
SYK (Phospho-Tyr525)	SYK	P43405	0.16	0.11	0.70
JunD (Phospho-Ser255)	JUND	P17535	1.85	1.29	0.70
Raf1 (Phospho-Ser43)	RAF1	P04049	0.98	0.69	0.70
c-PLA2 (Phospho-Ser505)	PLA2G4A	P47712	1.45	1.01	0.69
CDK1/CDC2 (Phospho-Tyr15)	CDK1	P06493	3.74	2.57	0.69
NFkB-p65 (Phospho-Thr254)	RELA	Q04206	2.67	1.82	0.68
Tau (Phospho-Thr181)	MAPT	P10636	2.37	1.61	0.68
FER (Phospho-Tyr402)	FER	P16591	1.40	0.95	0.68
HER2 (Phospho-Tyr877)	ERBB2	P04626	1.76	1.19	0.67
FosB (Phospho-Ser27)	FOSB	P53539	3.03	2.02	0.67
BRCA1 (Phospho-Ser1457)	BRCA1	P38398	0.53	0.35	0.66
Met (Phospho-Tyr1349)	MET	P08581	1.06	0.68	0.64
Catenin beta (Phospho-Thr41/Ser45)	CTNNB1	P35222	0.91	0.58	0.64
SLP-76 (Phospho-Tyr128)	LCP2	Q13094	0.84	0.53	0.63
GSK3 alpha/beta (Phospho-Tyr216/279)	GSK3A/GSK3B	P49840/P49841	2.48	1.56	0.63
NFkB-p65 (Phospho-Thr435)	RELA	Q04206	1.92	1.21	0.63
WASP (Phospho-Tyr290)	WAS	P42768	0.99	0.61	0.62
Stathmin 1 (Phospho-Ser15)	STMN1	P16949	1.01	0.62	0.61
Shc (Phospho-Tyr349)	SHC1	P29353	0.25	0.15	0.61
HDAC5 (Phospho-Ser498)	HDAC5	Q9UQL6	2.23	1.35	0.61
AKT1 (Phospho-Ser246)	AKT1	P31749	1.40	0.84	0.60
IL3RB (Phospho-Tyr593)	IL3RA	P26951	1.07	0.63	0.60
Myc (Phospho-Thr58)	MYC	P01106	1.53	0.91	0.59
Caveolin-1 (Phospho-Tyr14)	CAV1	Q03135	1.57	0.93	0.59
NFkB-p105/p50 (Phospho-Ser932)	NFKB1	P19838	2.05	1.21	0.59
CDK2 (Phospho-Thr160)	CDK2	P24941	1.60	0.93	0.58
Ezrin (Phospho-Tyr478)	EZR	P15311	2.28	1.32	0.58
LCK (Phospho-Tyr192)	LCK	P06239	1.40	0.80	0.57
HSP90B (Phospho-Ser226)	HSP90AB1	P08238	4.99	2.81	0.56
LIMK1 (Phospho-Thr508)	LIMK1	P53667	0.47	0.26	0.56
E2F1 (Phospho-Thr433)	E2F1	Q01094	1.02	0.56	0.55
PDGFR alpha (Phospho-Tyr849)	PDGFRA	P16234	0.98	0.54	0.55
ATPase (Phospho-Ser16)	ATP1A1	P05023	2.52	1.39	0.55
MEK1 (Phospho-Ser221)	MAP2K1	Q02750	3.43	1.86	0.54
Met (Phospho-Tyr1003)	MET	P08581	1.26	0.68	0.54
Keratin 18 (Phospho-Ser52)	KRT18	P05783	2.33	1.19	0.51
Caspase 3 (Phospho-Ser150)	CASP3	P42574	2.16	1.09	0.50
Zap-70 (Phospho-Tyr319)	ZAP70	P43403	0.88	0.44	0.50
LAT (Phospho-Tyr171)	LAT	O43561	0.62	0.31	0.50
Dok-1 (Phospho-Tyr398)	DOK1	Q99704	1.92	0.90	0.47
Progesterone Receptor (Phospho-Ser190)	PGR	P06401	0.89	0.41	0.46
PAK1/2/3 (Phospho-Ser141)	PAK1/2/3	Q13153/Q13177/O75914	1.79	0.82	0.46
BID (Phospho-Ser78)	BID	P55957	1.08	0.49	0.46
GluR1 (Phospho-Ser863)	GRIA1	P42261	2.55	1.16	0.45
B-RAF (Phospho-Ser446)	BRAF	P15056	2.61	1.17	0.45
ERK3 (Phospho-Ser189)	MAPK6	Q16659	3.09	1.38	0.45
VEGFR1 (Phospho-Tyr1333)	FLT1	P17948	1.53	0.68	0.44
HNF4 alpha (Phospho-Ser313)	HNF4A	P41235	1.56	0.68	0.44
Cortactin (Phospho-Tyr466)	CTTN	Q14247	2.73	1.14	0.42
Fos (Phospho-Thr232)	FOS	P01100	1.19	0.49	0.41
Estrogen Receptor-alpha (Phospho-Ser167)	ESR1	P03372	3.70	1.45	0.39
Catenin beta (Phospho-Ser37)	CTNNB1	P35222	0.97	0.36	0.37
PKR (Phospho-Thr451)	EIF2AK2	P19525	2.23	0.82	0.37
PKC zeta (Phospho-Thr560)	PRKCZ	Q05513	2.29	0.84	0.37
p53 (Phospho-Thr18)	TP53	P04637	2.58	0.94	0.36
Claudin 3 (Phospho-Tyr219)	CLDN3	O15551	2.36	0.22	0.09
